# Supplementary material for: Virus removal from drinking water using modified activated carbon fibers
Source: PubMed Central journal article supplement (PMC9041606; doi:10.1039/d1ra06373a), 2021-09-23
Supplement: RA-011-D1RA06373A-s001.pdf [file RA-011-D1RA06373A-s001.pdf]

## Supporting Information

# Virus Removal from Drinking Water using Modified Activated Carbon Fibers

Kamila Domagala, <sup>a,b\*</sup> Jon Bell,<sup>a</sup> Nur Sena Yüzbaşı,<sup>a</sup> Brian Sinnet,<sup>c</sup> Dariusz Kata,<sup>b</sup> Thomas Graule<sup>a</sup>

<sup>a</sup> Laboratory for High Performance Ceramics, Empa, Swiss Federal Laboratories for Materials Science and Technology, Überlandstrasse 129 Dübendorf, Switzerland

<sup>b</sup> Faculty of Materials Science and Ceramics, AGH, University of Science and Technology, al. Adama Mickiewicza 30 Krakow, Poland

<sup>c</sup> Department of Process Engineering, Eawag, Swiss Federal Institute of Aquatic Science and Technology, Überlandstrasse 133 Dübendorf, Switzerland

**KEYWORDS:** activated carbon fibers, oxygen functional groups, porous structure, copper ion adsorption, virus removal, point of zero charge

16

## Material characterization – details

17 **Porous structure characterization:** Approximately 100 mg of each sample was placed into  
18 the sample tube. The sample chamber was heated to 150 °C and evacuated to pressure of  
19 13  $\mu$ bar, which took 1 hour. Following this temperature and pressure stabilization phase, the  
20 samples were heated to 150 °C and outgassed for 2 hours. After degassing, samples were cooled  
21 to room temperature and weighed, in order to attain the dry weight. The sample tubes were  
22 attached to the instrument measuring ports and isothermal measurements were performed using  
23 a dewar filled with either: an ice-water mixture for CO<sub>2</sub> adsorption at 273 K or liquid nitrogen  
24 for N<sub>2</sub> adsorption at 77 K.

25 **Pore Size Distribution Analysis:** Pore size distribution analysis for both mesoporosity (2–  
26 50 nm) and microporosity (<2 nm) has been calculated from high-resolution N<sub>2</sub> sorption iso-  
27 therms at 77K using the Barrett-Joyner and Halender model (BJH) (2–50 nm) and the Density  
28 Functional Theory (DFT) model (developed by J. Jagiello and J.P. Olivier), respectively (as  
29 shown in Figures S8 – S10). The BJH adsorption and desorption pore size distributions show  
30 that most of the surface area in the mesopore range exists between 2–10 nm. However, the  
31 mesoporosity does not contribute significantly to the total surface area, and is not significantly  
32 affected by the oxidation treatment. Additionally, DFT shows that these carbons are exclusively  
33 microporous with the majority of the surface area existing between approximately 1–3 nm, as  
34 shown in Figure S10. Analysis with the DFT model shows a trimodal distribution of pores, with  
35 the distributions centered at pore widths equal to 1.6 nm, 1.9 nm and 2.3 nm for the as-received  
36 carbon ACF<sub>AR</sub>. Soxhlet extraction of as-received carbon (ACF<sub>AR+SOX</sub>) does not affect the dis-  
37 tribution significantly. However, oxidation (ACF<sub>OX</sub>) and oxidation followed by Soxhlet extrac-  
38 tion (ACF<sub>OX+SOX</sub>) affects the DFT pore size distribution significantly, with a loss of the trimodal

39 character and a vast reduction in micropore surface area (as shown in Figure S10). This indi-  
40 cates that functionalization with HNO<sub>3</sub> introduces surface oxygen functional groups that sig-  
41 nificantly block and reduce the micropores in activated carbon fibers.

42 **Elemental Analysis:** For the analysis of CHNS elements, the system was calibrated with the  
43 standard- Methionine, while ACF samples (approximately 0.4 mg) were weighed in tin cruci-  
44 bles and then loaded into the Flash Smart analyzer. For the analysis of the oxygen content,  
45 reference samples of the BBOT standard were used for equipment calibration. Samples (ap-  
46 proximately 1 mg) were weighed in silver crucibles and loaded into analyzer.

47 **Point of zero charge:** The pH of a series of 0.01 M NaCl solutions was adjusted from 1 - 12  
48 by adding either HCl or NaOH. Solutions were degassed by bubbling N<sub>2</sub> gas at 298 K to remove  
49 dissolved CO<sub>2</sub> until the initial pH stabilized. 75 mg of ACFs were added to 25 mL of the solu-  
50 tion. The final pH was recorded after 24 hours. The point at which initial pH and final pH values  
51 were equal was taken as the point of zero charge.

52 **Boehm titration:** 250 mg of ACFs into 25 mL of three reaction bases of 0.05 M NaOH,  
53 0.05 M NaHCO<sub>3</sub> and 0.05 M Na<sub>2</sub>CO<sub>3</sub><sup>1-3</sup>. The samples were stirred for 24 h in order to reach  
54 acid-base reaction equilibrium. Subsequently, the suspensions were filtered (PVDF membrane  
55 0.1 μm, 47 mm, Hawach Scientific Co., Ltd) and 10 mL aliquots of filtrate were collected. The  
56 aliquots were acidified by addition of 20 mL of standardized 0.05 M HCl. 20 mL of 0.05 M  
57 HCl for aliquots of the NaOH, NaHCO<sub>3</sub> reaction base and 30 mL of 0.05 M HCl for Na<sub>2</sub>CO<sub>3</sub>.  
58 The acidified sample was degassed via bubbling N<sub>2</sub> for 2 h to expel dissolved CO<sub>2</sub> and then  
59 back-titrated with a standardized solution of 0.05 M NaOH, while being continually saturated  
60 with N<sub>2</sub>. The endpoints were determined using a pH Meter (FiveEasyPlus, Mettler Toledo) and  
61 phenolphthalein as an indicator. All steps were performed at room temperature.

62 **X-ray photoelectron spectroscopy:** The measurements were performed using Al K $\alpha$   
63 (1254 eV) radiation and an analyzer pass energy of 100 eV. The spectra were recorded in nor-  
64 mal emission geometry with an energy resolution of 0.9 eV and the ultra-high vacuum (UHV)  
65 conditions of  $10^{-9}$  mbar. The area of analysis was approximately 3 mm<sup>2</sup> while depth of analysis  
66 was about 10 nm. The spectra were analyzed with the use of CasaXPS 2.3.15 software. The  
67 calculations of elements at the sample surface were performed with QUASES-IMFP-TPP2M  
68 Ver 2.2 software according to Tanuma et al.<sup>4</sup> Deconvolution of the spectrum on spectrum com-  
69 ponents was done according to the work by J.A. Leiro et al.<sup>5</sup>. Sample (the bunch of fibers) was  
70 mounted and positioned at the dedicated holder and pumped out to high vacuum then transferred  
71 into UHV chamber.

72 **Raman Spectroscopy:** Spectra were recorder in range 120-3500 cm<sup>-1</sup>. ACFs substrates were  
73 placed on glass disc and directly measured. OriginPro 2018 was used for peak fitting in the  
74 range of 800–1800 cm<sup>-1</sup> (first-order region). Background subtractions were performed by form-  
75 ing a baseline using the regions of 800–950 cm<sup>-1</sup> and 1750–1800 cm<sup>-1</sup>.

76 **Scanning electron microscope:** ACFs were directly placed on the carbon double-side adhe-  
77 sive tape and analyzed. Composites were sputtered with a layer of a conductive carbon

78 **X-ray diffraction:** The scans were acquired in the  $2\theta$  range of 5–80° with a step size of  
79 0.016° and a scanning speed of 0.021°s<sup>-1</sup>. Phase compositions of the spectra were analyzed  
80 with HighScore Plus software.

81 **ICP-MS of ACFs used for synthesis and composites:** ICP-MS (ICP-MS 7500CE, Agilent)  
82 was applied to determine copper concentrations in as-received fibers (ACF<sub>AR</sub>), fibers used for  
83 composites synthesis (ACF<sub>OX+SOX</sub>), as well as in manufactured composites CuACF<sub>OX+SOX</sub> and  
84 HCu ACF<sub>OX+SOX</sub>. ACFs and respective composites were acid digested using a microwave di-  
85 gestion system ultraCLAVE (MLS GmbH) prior to analysis. Digestions were performed in 40  
86 mL HNO<sub>3</sub> (65 %) and 5 mL H<sub>2</sub>O<sub>2</sub>, (30 %), for 50 mg samples. The ultra-CLAVE ran using the

87 following steps: Step 1: 25 °C to 160 °C in 10 min.; Step 2: 160 °C to 240 °C in 9 min.; Step 3:  
88 240 °C for 10 min. After cooling down, the solution was removed and filled up to 50 mL with  
89 nanopure water.

90

#### **Cartridge - details**

91 The glass cartridge was specially made for flow test, having following dimensions:  $d_{in}=8$  mm,  
92  $d_{out}=14.4$  mm,  $l=35$  mm. In the polymer inlet and outer caps of the cartridge, cut glass fiber filters  
93 (0.4  $\mu\text{m}$ , Macherey-Nagel) were placed to avoid fibers being released from the system.

94

95

## Tables

96 **Tab. S1** Composition of solutions used with DAL method with MS2 bacteriophages.

| Soft Agar (0.7%)              |             |                                                        |         |            |                       |                       |
|-------------------------------|-------------|--------------------------------------------------------|---------|------------|-----------------------|-----------------------|
| Nanopure H <sub>2</sub> O, mL |             | Tryptic Soy Agar, g                                    |         |            | MgSO <sub>4</sub> , g |                       |
| 1000                          |             | 32                                                     |         |            | 0.60                  |                       |
| Hard Agar (1.5%)              |             |                                                        |         |            |                       |                       |
| Nanopure H <sub>2</sub> O, mL |             | Tryptic Soy Agar, g                                    |         |            | MgSO <sub>4</sub> , g |                       |
| 1000                          |             | 40                                                     |         |            | 0.60                  |                       |
| Broth                         |             |                                                        |         |            |                       |                       |
| Nanopure H <sub>2</sub> O, mL | Tryptone, g | Yeast extract, g                                       | NaCl, g | Glucose, g | CaCl <sub>2</sub> , g | MgSO <sub>4</sub> , g |
| 1000                          | 1           | 0.10                                                   | 0.80    | 0.10       | 0.03                  | 0.015                 |
| Virus Dilution Buffer (VDB)   |             |                                                        |         |            |                       |                       |
| Nanopure H <sub>2</sub> O, mL |             | NH <sub>2</sub> C(CH <sub>2</sub> OH) <sub>3</sub> , g |         |            | MgSO <sub>4</sub> , g |                       |
| 1000                          |             | 2.50                                                   |         |            | 0.60                  |                       |

97

98 **Tab. S2** Pore structure and BET characterization by CO<sub>2</sub> and N<sub>2</sub> adsorption-desorption of acti-  
99 vated carbon fibers.

| Carbon sample         | Pore volume, cm <sup>3</sup> g <sup>-1</sup> |                                         | V <sub>CO<sub>2</sub></sub> /V <sub>N<sub>2</sub></sub> | x <sub>0</sub> <sup>c</sup> , nm | x <sub>0</sub> <sup>d</sup> , nm | SSA, m <sup>2</sup> g <sup>-1</sup> |
|-----------------------|----------------------------------------------|-----------------------------------------|---------------------------------------------------------|----------------------------------|----------------------------------|-------------------------------------|
|                       | V <sub>CO<sub>2</sub></sub> <sup>a</sup>     | V <sub>N<sub>2</sub></sub> <sup>b</sup> |                                                         |                                  |                                  |                                     |
| ACF <sub>AR</sub>     | 0.108                                        | 0.453                                   | 0.238                                                   | 1.08                             | 0.26                             | 1677                                |
| ACF <sub>AR+SOX</sub> | 0.130                                        | 0.468                                   | 0.279                                                   | 1.06                             | 0.29                             | 1769                                |
| ACF <sub>OX</sub>     | 0.137                                        | 0.186                                   | 0.740                                                   | 1.06                             | 0.79                             | 698                                 |
| ACF <sub>OX+SOX</sub> | 0.141                                        | 0.397                                   | 0.356                                                   | 0.96                             | 0.34                             | 1652                                |

100

a obtained from an intercept of D-R plot

101

b obtained from Langmuir model at p/p<sup>0</sup>=1

102

c mean radius of the micropore (N<sub>2</sub> at 77 K)

103

d mean radius of the micropore (CO<sub>2</sub> at 273 K)

104

105

106 **Tab. S3** Functional groups concentrations determined by Boehm titration of activated carbon  
 107 fiber.

| Carbon sample         | Phenolic, mmol/g | Lactone, mmol/g | Carboxylic, mmol/g | Total amount, mmol/g |
|-----------------------|------------------|-----------------|--------------------|----------------------|
| ACF <sub>AR</sub>     | 0.36             | 0.00            | 0.10               | 0.46                 |
| ACF <sub>AR+SOX</sub> | 0.11             | 0.31            | 0.30               | 0.72                 |
| ACF <sub>OX</sub>     | 0.04             | 1.01            | 2.26               | 3.31                 |
| ACF <sub>OX+SOX</sub> | 0.83             | 0.61            | 2.04               | 3.48                 |

108

109 **Tab. S4:** Adsorption parameters obtained from Langmuir equation for Cu<sup>2+</sup><sub>(aq)</sub> ion adsorption;

| Carbon sample         | pH <sub>init</sub> | Langmuir equation                     |                         |                |
|-----------------------|--------------------|---------------------------------------|-------------------------|----------------|
|                       |                    | n <sub>m</sub> , mmol·g <sup>-1</sup> | K, L·mmol <sup>-1</sup> | R <sup>2</sup> |
| ACF <sub>AR</sub>     | unchanged(4.3)     | 2.00                                  | 0.036                   | 0.941          |
|                       | 4.0                | 0.99                                  | 0.118                   | 0.975          |
|                       | 1.0                | 0.93                                  | 0.095                   | 0.934          |
| ACF <sub>OX+SOX</sub> | unchanged (4.3)    | 1.24                                  | 0.451                   | 0.993          |
|                       | 4.0                | 1.75                                  | 0.269                   | 0.996          |
|                       | 2.0                | 0.90                                  | 0.551                   | 0.921          |
|                       | 1.0                | 0.88                                  | 0.251                   | 0.919          |

110

111 **Tab. S5** Pore volumes and specific surface areas of activated carbon fibers based composites.

| ACFs composite           | Pore volume, cm <sup>3</sup> ·g <sup>-1</sup> |                              | V <sub>CO2</sub> /V <sub>N2</sub> | SSA, m <sup>2</sup> ·g <sup>-1</sup> |
|--------------------------|-----------------------------------------------|------------------------------|-----------------------------------|--------------------------------------|
|                          | V <sub>CO2</sub> <sup>a</sup>                 | V <sub>N2</sub> <sup>b</sup> |                                   |                                      |
| CuACF <sub>OX+SOX</sub>  | 0.067                                         | 0.160                        | 0.420                             | 584                                  |
| HCuACF <sub>OX+SOX</sub> | 0.077                                         | 0.181                        | 0.425                             | 635                                  |

112 a obtained from an intercept of DR plot

113 b obtained from Langmuir model at p/p<sup>0</sup>=1

114

115

116 **Tab. S6** XPS profiles of functional groups for copper impregnated ACFs before and after heat-  
 117 treatment.

| ACFs composite           | Components from C 1s profile (at.%)  |                             |                                                    |                                                     |                                                       |                 |
|--------------------------|--------------------------------------|-----------------------------|----------------------------------------------------|-----------------------------------------------------|-------------------------------------------------------|-----------------|
|                          | A: C-C                               | B: C-O + C-N                | C: C=O + C=N                                       | D: COOH                                             | E: CO <sub>3</sub>                                    | X: C-Me + NC-Me |
| CuACF <sub>OX+SOX</sub>  | 54.50                                | 5.69                        | 4.11                                               | 9.22                                                | 3.89                                                  | 2.33            |
| HCuACF <sub>OX+SOX</sub> | 59.00                                | 7.77                        | 4.93                                               | 6.65                                                | 4.42                                                  | 4.04            |
| ACFs composite           | Components from O 1s profile (at.%)  |                             |                                                    |                                                     |                                                       |                 |
|                          | A: O-Me                              | B: OH                       | C: O-C + H <sub>2</sub> O                          | D: O-C=                                             |                                                       |                 |
| CuACF <sub>OX+SOX</sub>  | 0.63                                 | 5.85                        | 10.65                                              | 0.90                                                |                                                       |                 |
| HCuACF <sub>OX+SOX</sub> | 0.47                                 | 3.87                        | 5.34                                               | 0.77                                                |                                                       |                 |
| ACFs composite           | Components from N 1s profile (at.%)  |                             |                                                    |                                                     |                                                       |                 |
|                          | A: N-Me + Me-CN                      | B: N-C                      | C: NH <sub>4</sub> <sup>+</sup>                    | D: N <sup>3+</sup> -O; NO <sub>2</sub> <sup>-</sup> | E: N <sup>5+</sup> -O-C; NO <sub>3</sub> <sup>-</sup> |                 |
| CuACF <sub>OX+SOX</sub>  | 0.35                                 | 0.63                        | 0.34                                               | 0.26                                                | 0.06                                                  |                 |
| HCuACF <sub>OX+SOX</sub> | 0.18                                 | 0.73                        | 0.14                                               | 0.28                                                | 0.05                                                  |                 |
| ACFs composite           | Components from Cu 2p profile (at.%) |                             |                                                    |                                                     |                                                       |                 |
|                          | A: Cu <sup>+</sup> -CN               | B: Cu <sup>2+</sup> -O, CuO | C: Cu <sup>2+</sup> -OH, Cu <sup>2+</sup> in salts | X: Cu-C                                             |                                                       |                 |
| CuACF <sub>OX+SOX</sub>  | 0.41                                 | 0.18                        | 0.05                                               | 0.00                                                |                                                       |                 |
| HCuACF <sub>OX+SOX</sub> | 1.04                                 | 0.17                        | 0.09                                               | 0.08                                                |                                                       |                 |

118



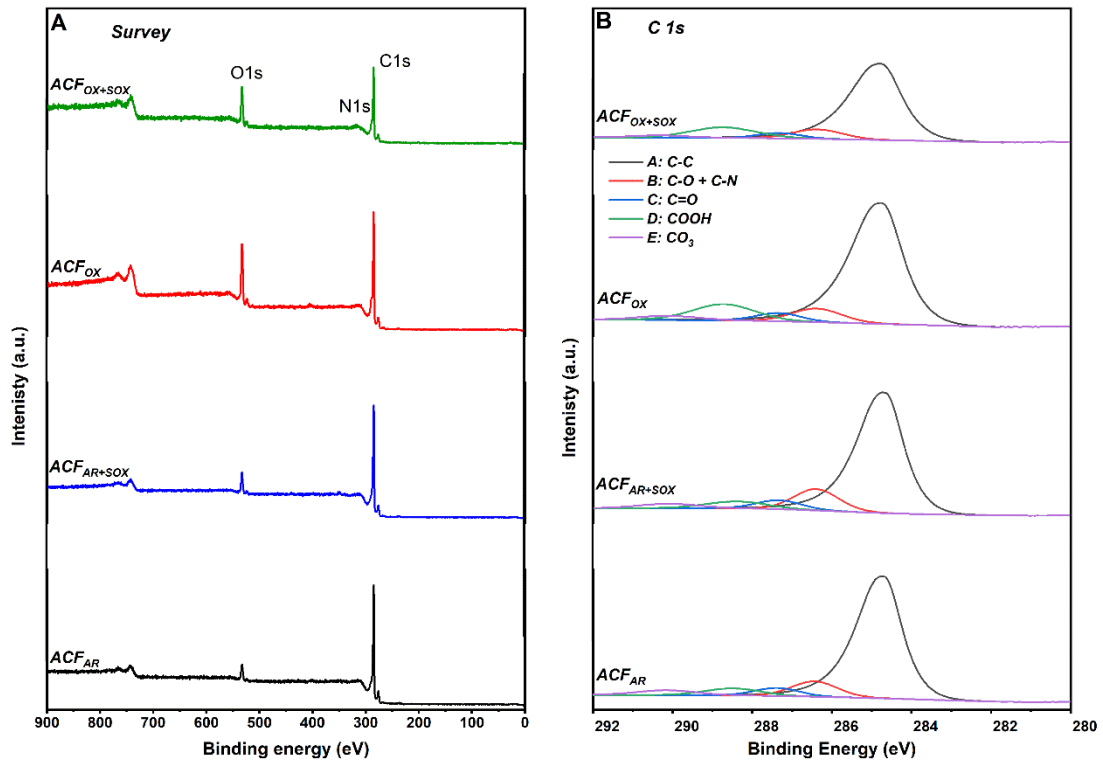

120

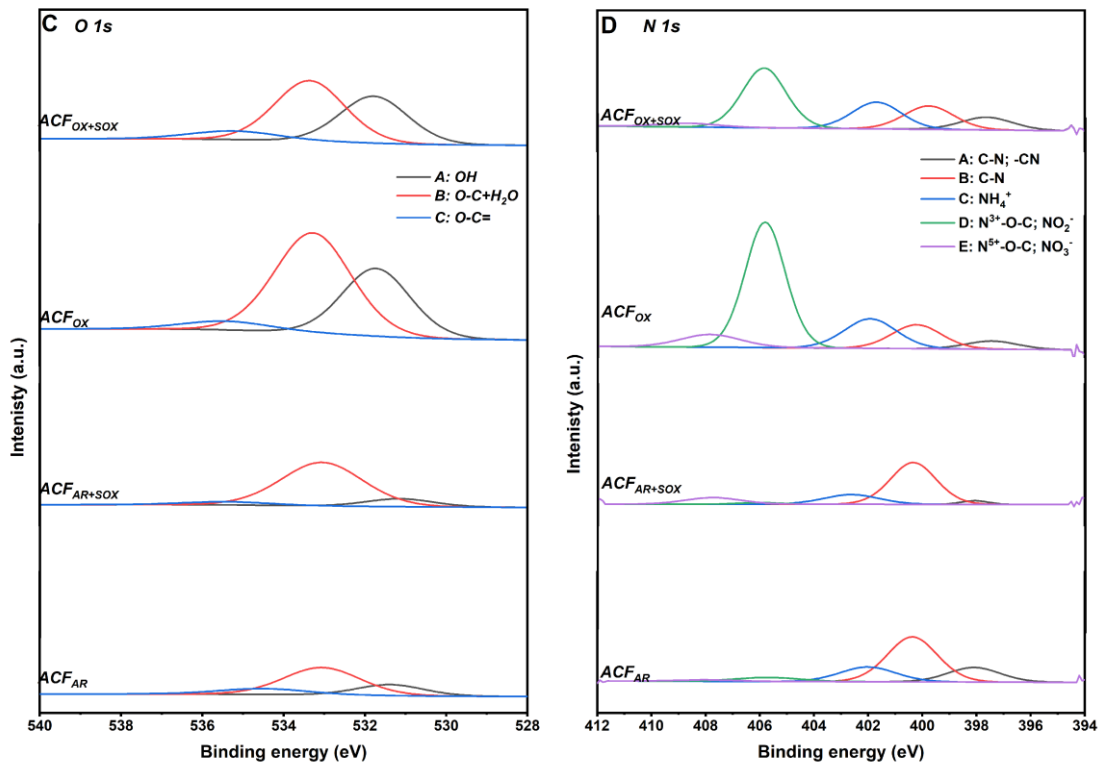

121

122 **Fig. S1** XPS spectrum a) Survey; b) C 1s; c) O 1s; d) N 1s of activated carbon fibers.

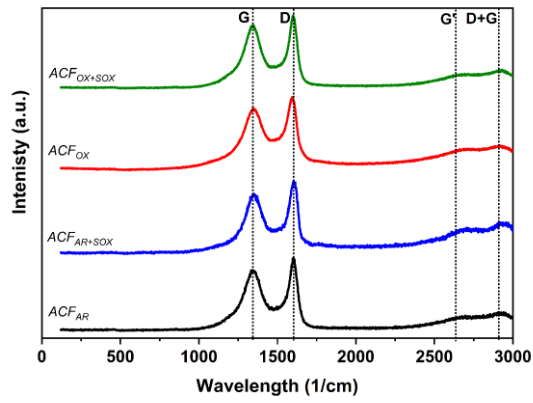

123

124 **Fig. S2** Raman spectroscopy of all activated carbon fibers.

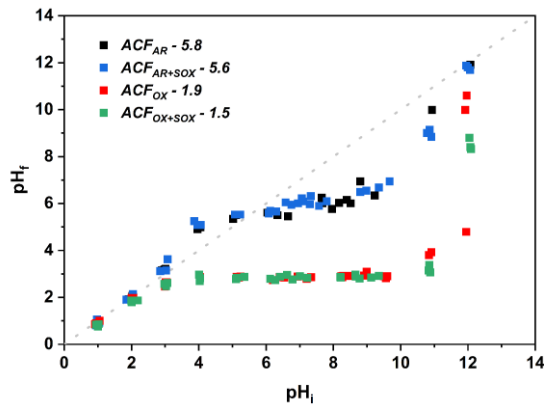

125

126 **Fig. S3** Graph of final pH versus initial pH of activated carbon fibers.

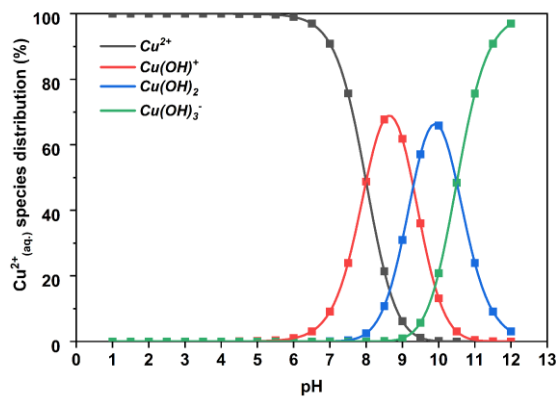

127

128 **Fig. S4** Speciation diagram of copper.

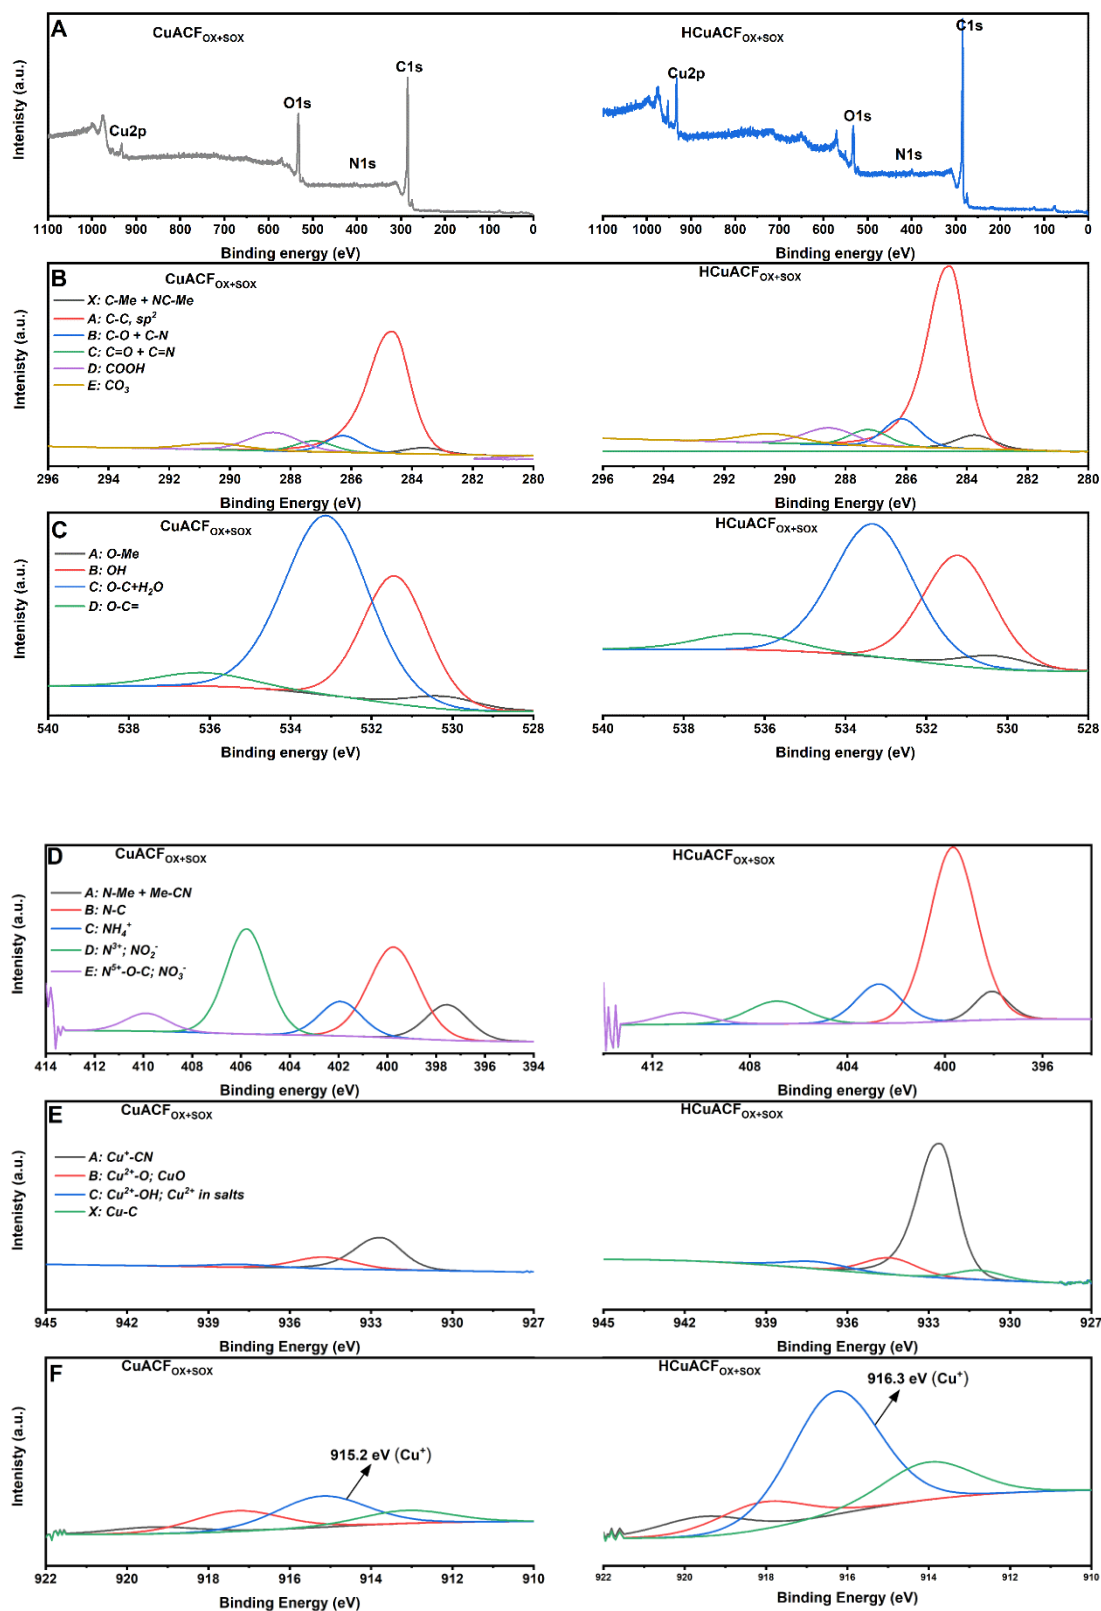

129

130

131 **Fig. S5** XPS spectra a) Survey; b) C 1s; c) O 1s; d) N 1s; e) Cu 2p; f) Cu LVV XANES of  
 132 ACFO<sub>X+SOX</sub> based composites.

133

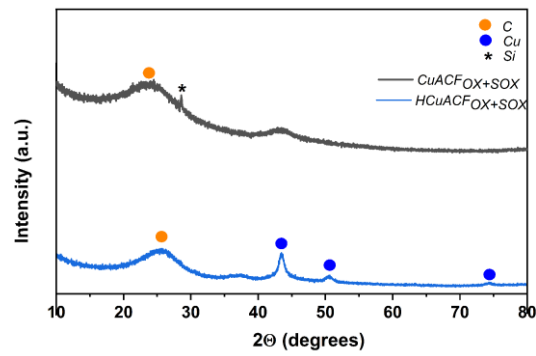

134 **Fig. S6** XRD patterns of activated carbon fibers based composites (Si peak comes from the  
135 sample holder).

136

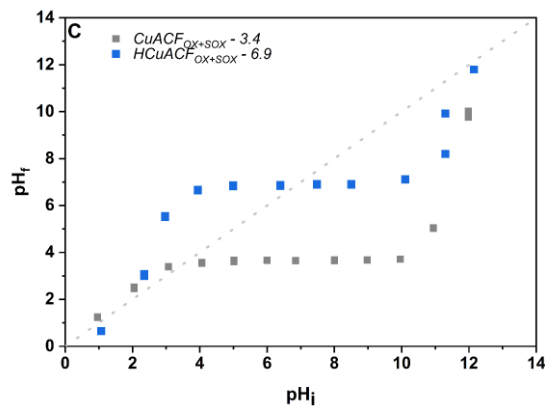

137 **Fig. S7** Graph of final pH versus initial pH of composites.

138

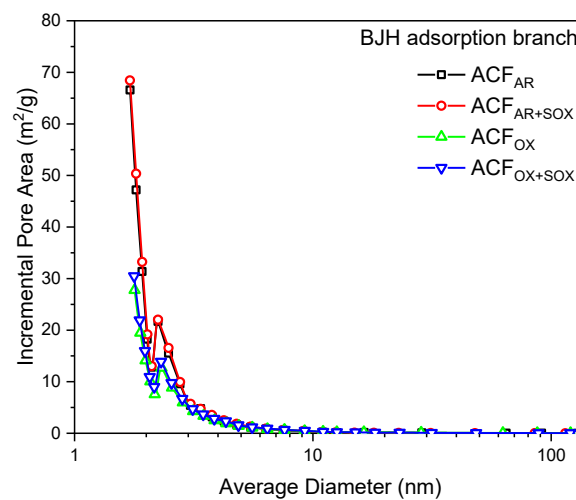

139 **Fig. S8** Pore size distribution calculated from adsorption branch using the BJH model.

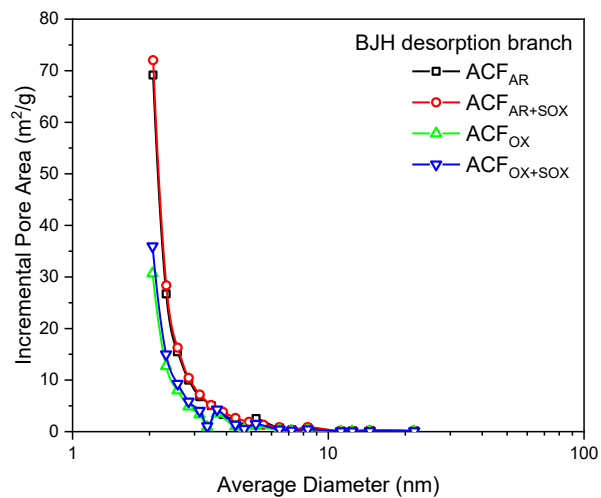

140

141 **Fig. S9** Pore size distribution calculated from desorption branch using the BJH model.

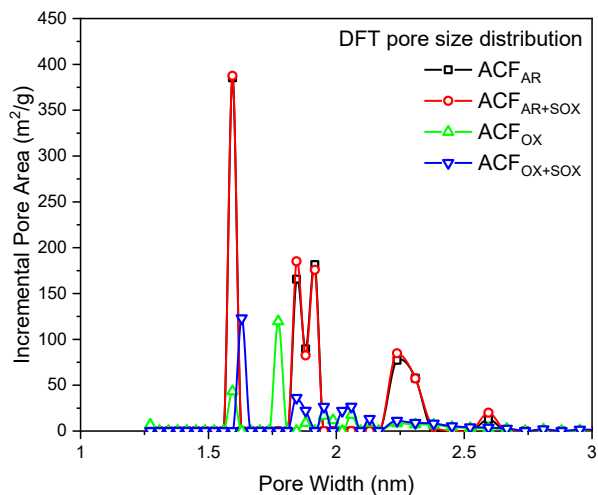

142

143 **Fig. S10** Pore size distribution calculated from the density functional theory (DFT) model.

144

145 **References**

- 146 1 A. M. Oickle, S. L. Goertzen, K. R. Hopper, Y. O. Abdalla and H. A. Andreas, *Carbon*  
147 *N. Y.*, , DOI:10.1016/j.carbon.2010.05.004.
- 148 2 S. L. Goertzen, K. D. Thériault, A. M. Oickle, A. C. Tarasuk and H. A. Andreas, *Carbon*  
149 *N. Y.*, 2010, **48**, 1252–1261.
- 150 3 M. Voll and H. P. Boehm, *Carbon N. Y.*, 1971, **9**, 481–488.
- 151 4 S. Tanuma, C. J. Powell and D. R. Penn, *Surf. Interface Anal.*, 1994, **21**, 165–176.
- 152 5 J. A. Leiro, M. H. Heinonen, T. Laiho and J. G. Baitrev, *J. Electron Spectrosc. Relat.*  
153 *Phenom.*, 2003, **128**, 205–213.
